# Supplementary material for: The impact of aerosols on photolysis frequencies and ozone production in Beijing during the 4-year period 2012–2015
Source: Copernicus journal article supplement (doi:10.5194/acp-19-9413-2019), 2019-07-23
Supplement: Supplementary file 1 [file acp-19-9413-2019-supplement.pdf]

Supplement of Atmos. Chem. Phys., 19, 9413–9429, 2019  
<https://doi.org/10.5194/acp-19-9413-2019-supplement>  
© Author(s) 2019. This work is distributed under  
the Creative Commons Attribution 4.0 License.

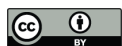

Atmospheric  
Chemistry  
and Physics  
Open Access  
EGU

*Supplement of*

## **The impact of aerosols on photolysis frequencies and ozone production in Beijing during the 4-year period 2012–2015**

**Wenjie Wang et al.**

*Correspondence to:* Xin Li (li\_xin@pku.edu.cn) and Min Shao (mshao@pku.edu.cn)

The copyright of individual parts of the supplement might differ from the CC BY 4.0 License.

## Supporting information

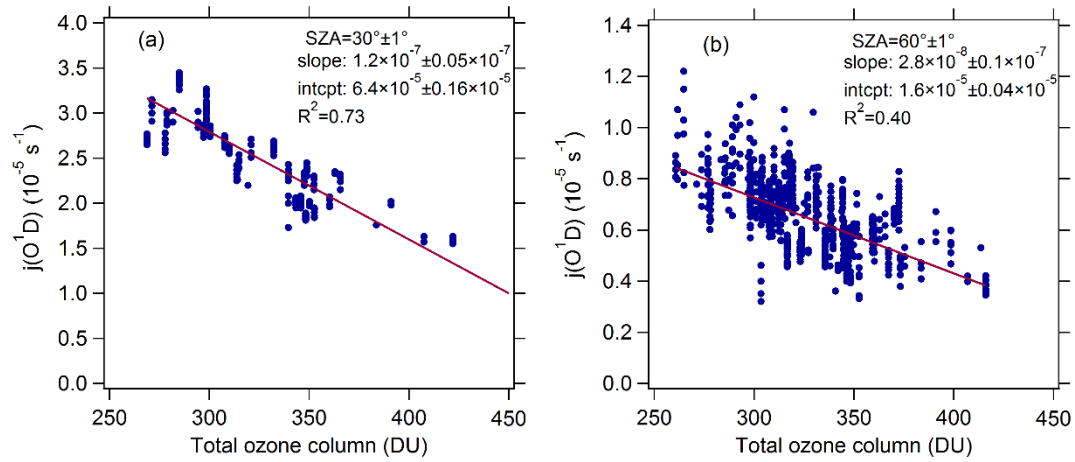

Figure S1. Dependence of  $j(\text{O}^1\text{D})$  on AOD (380nm) at low AOD level ( $\text{AOD} < 0.3$ ) and SZA of (a)  $30^\circ \pm 1^\circ$  and (b)  $60^\circ \pm 1^\circ$ , respectively.

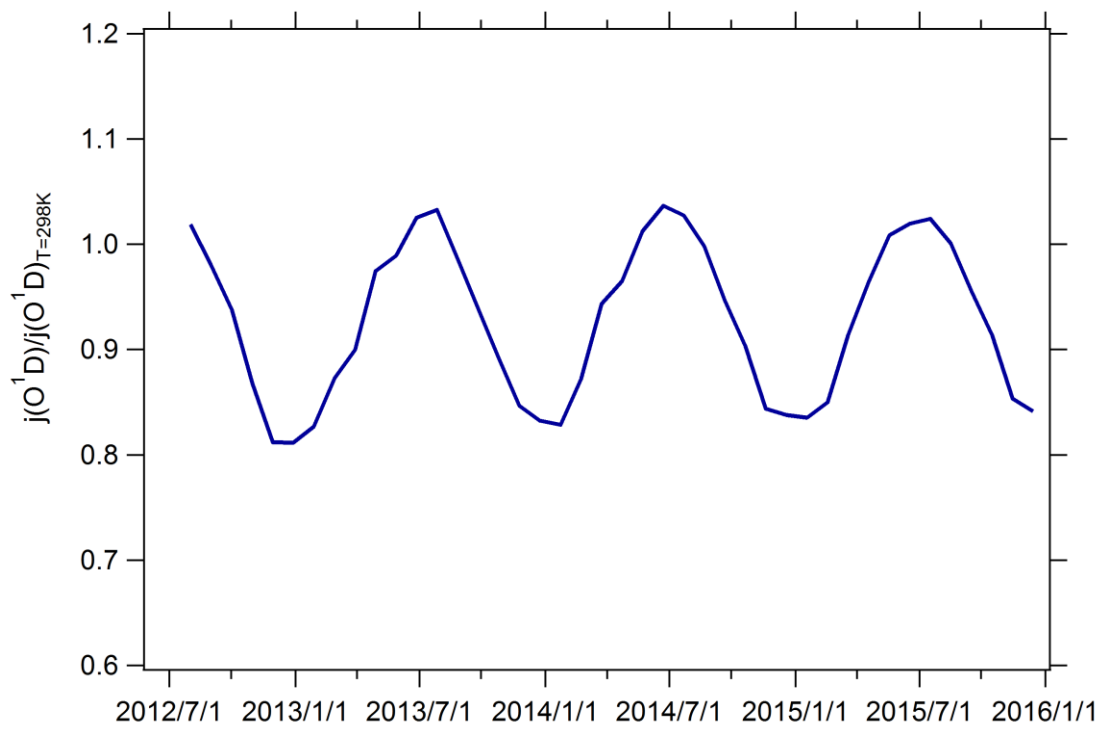

Figure S2. The time series of the monthly mean ratio of  $j(\text{O}^1\text{D})$  to  $j(\text{O}^1\text{D})_{T=298\text{K}}$  ( $j(\text{O}^1\text{D})/j(\text{O}^1\text{D})_{T=298\text{K}}$ ) from August 2012 to December 2015.

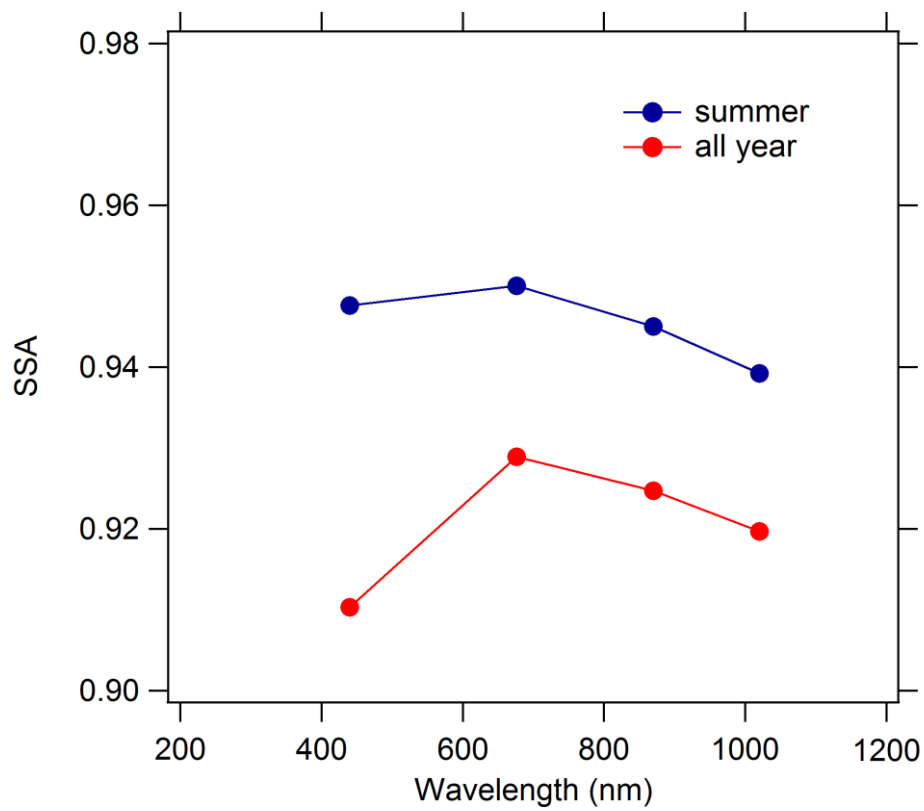

Figure S3. The dependence of AERONET based SSA on wavelength.

Table S1. The seasonal mean AOD and SSA of AERONET.

| Seasons | Spring          | Summer          | Autumn          | Winter          |
|---------|-----------------|-----------------|-----------------|-----------------|
| AOD     | $0.83 \pm 0.72$ | $0.99 \pm 0.90$ | $0.59 \pm 0.70$ | $0.47 \pm 0.47$ |
| SSA     | $0.91 \pm 0.03$ | $0.94 \pm 0.02$ | $0.91 \pm 0.03$ | $0.88 \pm 0.03$ |
